# Supplementary material for: Interleukin 13 and Serotonin: Linking the Immune and Endocrine Systems in Murine Models of Intestinal Inflammation
Source: PubMed Central journal article supplement (PMC3755966; doi:10.1371/journal.pone.0072774), 2013-08-28

**A**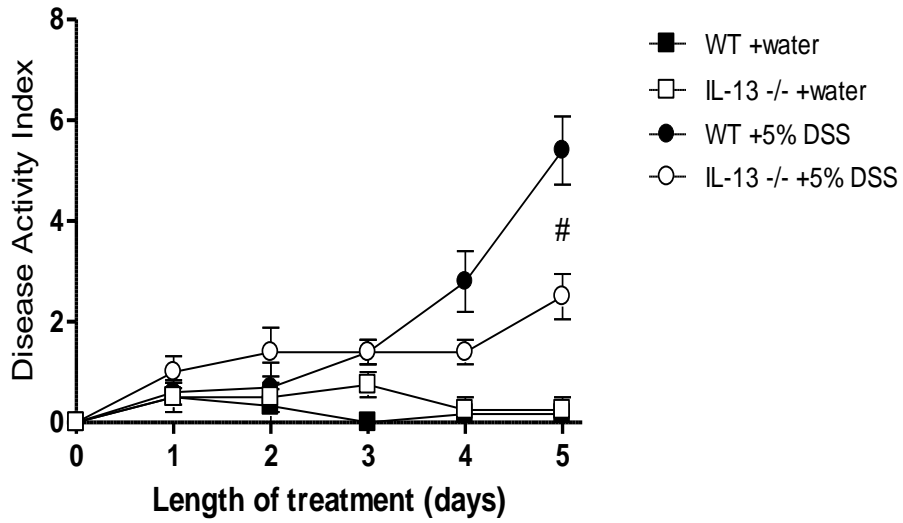**B**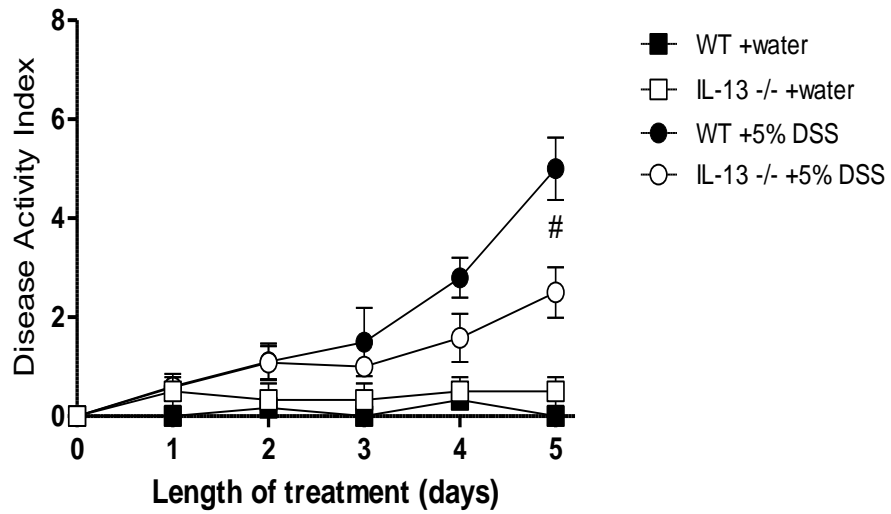

Supplement: pone.0072774.s001.pdf [file pone.0072774.s001.pdf]
