# Supplementary material for: Interleukin 13 and Serotonin: Linking the Immune and Endocrine Systems in Murine Models of Intestinal Inflammation
Source: PubMed Central journal article supplement (PMC3755966; doi:10.1371/journal.pone.0072774), 2013-08-28

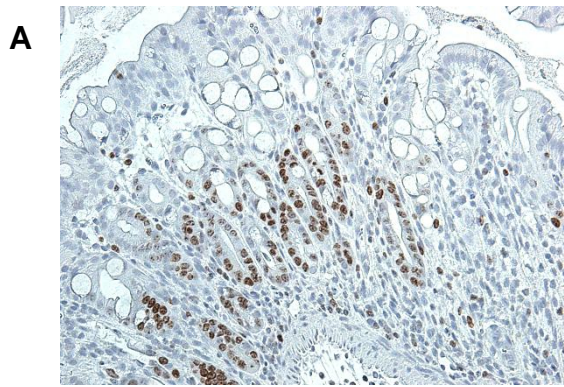

WT +5% DSS

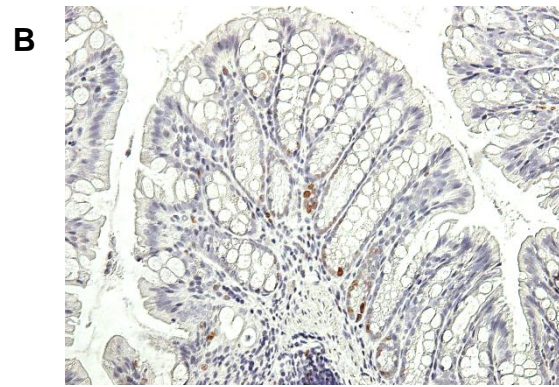

IL-13<sup>-/-</sup> +5% DSS

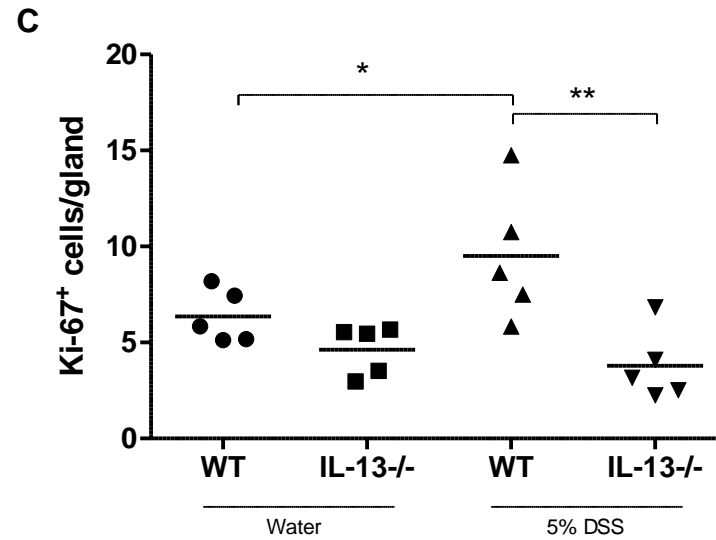

Supplement: pone.0072774.s002.pdf [file pone.0072774.s002.pdf]
